# Supplementary material
Source: Research Square preprint supplement (doi:10.21203/rs.3.rs-9285713/v1)
Supplement: Supplementary file 1 [file 1d90cd64ddb22af0413c6792.docx]

|  | Reference | Publication Type |
| --- | --- | --- |
| 1 | Ascha et al. (2019) | Literature review |
| 2 | Bellinga et al. (2017) | Case report series |
| 3 | DeBoulle et al. (2021) | Case report series |
| 4 | Facque et al. (2019) | Literature review |
| 5 | Ginsberg et al. (2016) | Cross-sectional study |
| 6 | Ginsberg et al. (2017) | Editorial |
| 7 | Glorion et al. (2022) | Literature review |
| 8 | Gupta et al. (2019) | Cross-sectional study |
| 9 | Kannan et al. (2022) | Case report |
| 10 | Lam et al. (2017) | Case report |
| 11 | La Padula et al. (2019) | Cross-sectional study |
| 12 | MacGregor & Chang (2022) | Literature review |
| 13 | Morrison et al. (2016) | Systematic literature review |
| 14 | Raffaini et al. (2018) | Cross-sectional study |
| 15 | Spiegel (2010) | Longitudinal study |
| 16 | Tebbens et al. (2019) | Cohort study |
| 17 | Viscomi (2022) | Case report series |
