# Supplementary material
Source: Research Square preprint supplement (doi:10.21203/rs.3.rs-9285713/v1)
Supplement: Supplementary file 2 [file 25d64486fb6e7bd28f9629d7.docx]

| Acronym | Description |
| --- | --- |
| P (Problem) | Need for procedures to feminize the face |
| I (Intervention) | Surgical and/or non-surgical treatment to feminize the face |
| C (Comparison) | None |
| O (Result) | Masculine face resulting in a face with a feminine appearance |
