# Supplementary material
Source: Research Square preprint supplement (doi:10.21203/rs.3.rs-9285713/v1)
Supplement: Supplementary file 3 [file 299ca7f5b5ac2485de79dee2.docx]

| **Reference** | **n** | **Age range (mean)** | **Country of origin of sample/study** | **Surgical procedure** | **Complications**  **(number of complications in the sample****)** | **Outcome (numerical data)** | **Follow up**  **(months)** |
| --- | --- | --- | --- | --- | --- | --- | --- |
| Bellinga et al. (2017) | 200 | 18 – 70 (40,2) | Study (Spain) Sample (ND) | Rhinoplasty, frontal region reconstruction, and lip lift | (0) | Larger frontonasal angle 149.08º (0.57º)  Increase of 15.44º | 32 |
| Facque et al. (2019) | NA | NA | NA | Frontal bone osteotomy, alloplastic forehead augmentation, anterior sinus plate removal, capillary implantation line advancement, rhinoplasty, zygomatic augmentation, lip lift, mandibular osteotomy, mentoplasty, hair transplant | ND | NA | NA |
| Glorion et al. (2022) | NA | NA | NA | Mentoplasty | Temporary neurosensory rupture of the inferior alveolar nerve, sensory disturbances of the lip and chin due to damage to the inferior alveolar nerve, hematoma, damage to the tooth root, surgical site infections, disjunctions, salivary fistulas or resorption of the osteotomized bone segments. | NA | NA |
| Gupta et al. (2019) | 25 | 37 – 65 (53,9) | Study (US) Sample (ND) | Rhytidoplasty, recontouring of the frontal region with an eyebrow lift, implants in the region zygomatic, rhinoplasty, mandibular recontouring | Infection, pulmonary embolism | It is safe to perform multiple surgical procedures in different planes in a single surgical procedure. The complications reported were due to the individual procedures, not the numerous surgeries | 20.58 weeks |
| Kannan et al. (2022) | 1 | 18 | India | Mandibular advancement | (0) | 5 mm of mandibular advancement, relation of the bone bases and Angle Classification in Class I | ND |
| Lam et al. (2017) | 1 | 65 | Study (US) Sample (ND) | Recontouring of the frontal region | Sinocutaneous fistula | Complete closure of sinocutaneous fistula | 9 |
| La Padula et al. (2019) | 25 | ND | Study (France) Sample (ND) | Frontal recontouring, advancement of the hairline, rhinoplasty, orthognathic | (0) | Surgery duration 420 min; Preparation of the three-dimensional model 145 min | 12 |
| MacGregor &Chang (2022) | NA | NA | NA | Rhinoplasty, chin and forehead implants | NA | NA | NA |
| Morrison et al. (2016) | NA | NA | NA | Frontal recontouring, rhinoplasty, mentoplasty, mandibular angle reduction, bimaxillary osteotomy, zygomatic osteotomy, and hairline advancement. | Excessive mobility in bones that have not united; minor fluid accumulation; cartilaginous edema | NA | NA |
| Raffaini et al. (2018) | 9 | 19 – 33 (21) | Study (Italy) Sample (ND) | Total facial feminization surgery | (0) | Patient satisfaction with the scale stated significant improvement with mild irregularities and notable improvement | 12 |
| Spiegel (2010) | 168 | 18 – 62 (31,5) | Study (US) Sample (ND) | Cranioplasty of the frontal region | Mobility and non-union of frontal bone fragments (ND) | Modifications to the forehead and eyebrows were considered more feminizing in a frontal view (100%) and to the nose in a sagittal view (13%) |  |

Legend: NA: Not applicable. ND: Not described.
