# Supplementary material
Source: Research Square preprint supplement (doi:10.21203/rs.3.rs-9285713/v1)
Supplement: Supplementary file 4 [file 2e766e36e79aafba60af37d6.docx]

| Reference | n | Age | Country of origin of the sample | Non-surgical procedure | Complications (number of complications in the sample) | Results (Numerical data) | Follow up |
| --- | --- | --- | --- | --- | --- | --- | --- |
| Ascha et al. (2019) | NA | NA | NA | Fillers, neurotoxins, fat grafting, neck suction lipectomy, deoxycholic acid | NA | NA | NA |
| DeBoulle et al. (2021) | 6 | 20-60 years | Study (Multicenter) Sample (ND) | Botulinum toxin type A and hyaluronic acid | (0) | Eyebrow lifts 1.0 cm3 of lip augmentation, 1.8 – 2.0 cm3 of increase in the zygomatic area, 1.5 cm3 of mental tapering, 1.2 cm3 of frontal reduction. | ND |
| Ginsberg et al. (2016) | 94 | 18-93 (45,5) | Study (USA) Sample (USA) | Not reported (questionnaire) | (0) | 19% of the sample reported having injectable procedures 45% of the sample considered the face as a priority for change. | ND |
| Ginsberg et al. (2017) | NA | NA | NA | Neurotoxins and fillers | ND | NA | ND |
| Tebbens et al. (2019) | 19 | (28) | Study (Netherlands) Sample (ND) | Hormonal treatment | (0) | There was an increase in tissue in the zygomatic region (0.5 mm) and a reduction in the mandibular region (0.6 mm). The changes began after three months of hormonal treatment and continued for up to one year. | 12 months |
| Viscomi (2022) | 5 | 28-38 (31) | Study (Brazil) Sample (ND) | TB type A, HA and calcium hydroxyapatite | (0) | Treatment plans with fast and reversible executions. | ND |
