# Supplementary material
Source: Research Square preprint supplement (doi:10.21203/rs.3.rs-9285713/v1)
Supplement: Supplementary file 5 [file 43ee910b7476aa4e789a0bfb.docx]

| Database | Controlled and uncontrolled terms, using boolean operators |
| --- | --- |
| Medline via Pubmed | (((((feminization) AND (Face)) AND (Female Facial)) AND (Transgender)) AND (Male-to-Female))  (((((feminization) AND (Face)) AND (Female Facial)) AND (Transgender)) AND (Male-to-Female)) NOT (surgery)  (((((feminization) AND (Face)) AND (Female Facial)) AND (Transgender)) AND (Male-to-Female)) AND (facial harmonization) |
| Lilacs | feminilização AND face AND face feminina AND transgênero |
| Scielo | feminilização AND face AND face feminina AND transgênero |
| Cochrane Library | (((((feminization) AND (Face)) AND (Female Facial)) AND (Transgender)) AND (Male-to-Female)) |
