# Supplementary material
Source: Research Square preprint supplement (doi:10.21203/rs.3.rs-9285713/v1)
Supplement: Supplementary file 6 [file 90153f58c1ba3dc5b250824d.docx]

| Reference / Question | 1 | 2 | 3 | 4 | 5 | 6 | 7 | 8 |
| --- | --- | --- | --- | --- | --- | --- | --- | --- |
| De Boulle et al. (2021) |  |  |  |  |  |  |  |  |
| Kannan et al. (2022) |  |  |  |  |  |  |  |  |
| Lam et al. (2017) |  |  |  |  |  |  |  |  |
| Viscomi (2022) |  |  |  |  |  |  |  |  |

Legend: Question 1: Were the patient's demographic characteristics clearly described? Question 2: Was the patient's history clearly described and presented as a timeline? Question 3: Was the patient's current clinical condition at presentation clearly described? Question 4: Were the diagnostic tests, assessment methods, and outcomes clearly described? Question 5: Were the intervention(s) or treatment procedure(s) clearly described? Question 6: Was the post-intervention clinical condition clearly described? Question 7: Were adverse events (harms) or unanticipated events identified and described? Question 8: Does the case report provide lessons learned?

Low Moderate High Not applicable
