# Supplementary material
Source: Research Square preprint supplement (doi:10.21203/rs.3.rs-9285713/v1)
Supplement: Supplementary file 7 [file d6d54a248b4d5edbd555d8a3.docx]

| Reference / Question | 1 | 2 | 3 | 4 | 5 | 6 | 7 | 8 | 9 |
| --- | --- | --- | --- | --- | --- | --- | --- | --- | --- |
| Ginsberg et al. (2016) |  |  |  |  |  |  |  |  |  |
| Bellinga et al. (2017) |  |  |  |  |  |  |  |  |  |
| Gupta et al. (2019) |  |  |  |  |  |  |  |  |  |
| La Padula et al. (2019) |  |  |  |  |  |  |  |  |  |
| Raffaini et al., (2019) |  |  |  |  |  |  |  |  |  |
| Tebbens et al. (2019) |  |  |  |  |  |  |  |  |  |
| Spiegel et al. (2010) |  |  |  |  |  |  |  |  |  |

Legend: Question 1: Was the sampling frame appropriate for the target population? Question 2: Were study participants sampled appropriately? Question 3: Was the sample size adequate? Question 4: Were the study subjects and setting described in detail? Question 5: Was data analysis conducted with sufficient coverage of the identified sample? Question 6: Were valid methods used to determine the condition? Question 7: Was the condition measured in a standard and reliable way for all participants? Question 8: Was there appropriate statistical analysis? Question 9: Was the response rate adequate, and if not, was the low response rate managed appropriately?

Low Moderate High Not applicable
